# Supplementary material for: Monkeypox Vaccine Hesitancy in French Men Having Sex with Men with PrEP or Living with HIV in France
Source: MDPI journal article supplement (doi:10.3390/vaccines10101629), 2022-09-28
Supplement: s1 [file s1]

Supplementary file: questionnaire for MPXV vaccination

|                                                                                                         |                                                                                |
|---------------------------------------------------------------------------------------------------------|--------------------------------------------------------------------------------|
| Item 1 - Do you want to get vaccinated against MPXV?                                                    | Yes/nor for the moment/no                                                      |
| Item 2 - Age                                                                                            | 18-29 years / 30-39 years / 40-49 years / 50-59 years / more than 60 years old |
| Item 3 – Area of Origin                                                                                 | Africa / America / Asia-Oceania / Europe                                       |
| Item 4 - Socio-professional status                                                                      | Manager / Employee / Student / Retired / Unemployed                            |
| Item 5 - Are you in a “stable” relationship (i.e., relationship for many years, civil union, marriage?) | Yes/no                                                                         |
| Item 6 - Do you use means of protection during your sexual intercourse (condoms)?                       | Yes/Sometimes/no                                                               |
| Item 7 - Do you practice Chemsex?                                                                       | Yes/no                                                                         |
| Item 8 - Have you had any STI (chlamydia, gonorrhea, syphilis) in the past 3 months                     | Yes/no                                                                         |
| Item 9 - Have you been vaccinated against COVID-19                                                      | Yes/no                                                                         |
| Item 10 - Do you feel at risk of being infected by MPXV?                                                | Yes/no                                                                         |
| Item 11 Have you ever refused a vaccine because you consider it useless or dangerous.?                  | Yes/no                                                                         |
| Item 12 - Have you ever agreed to get vaccinated despite doubts about its effectiveness?                | Yes/no                                                                         |
| Item 13 - As an adult, have you ever refused vaccination for reasons other than illness or allergy?     | Yes/no                                                                         |
| Item 14 - People are getting more vaccines than needed?                                                 | Yes/no                                                                         |
| Item 15 - Vaccines are important to me to stay healthy.                                                 | Yes/no                                                                         |
| Item 16 - The proposed human smallpox vaccine is important in reducing the spread of the outbreak.      | Yes/no                                                                         |
| Item 17 - The human smallpox vaccine should be compulsory for people at risk.                           | Yes/no                                                                         |
| Item 18 – Am-I likely to be more vulnerable to MPXV as a chronically ill patient?                       | Yes/no                                                                         |
| Item 19 - Vaccination against MPXV is important for me as a patient with chronic disease.               | Yes/no                                                                         |
| Item 20 – I am concerned about serious side effects from the human smallpox vaccine.                    | Yes/no                                                                         |
| Item 21 - I need more information on the human smallpox vaccine than is given to the public now.        | Yes/no                                                                         |
| Item 22 - I trust information I receive about the human smallpox vaccine from my doctor(s).             | Yes/no                                                                         |
| Item 23 - Participant’s experience with MPXV (I personally know someone who has had a MPXV infection.   | Yes/no                                                                         |
| Item 24 - Participant’s experience with MPXV (I was a contact case for the MPXV.                        | Yes/no                                                                         |
| Item 25 - Number of different sexual partners in the last month                                         | Number 0 to 100                                                                |
| Item 26 - Number of different sexual partners in the last three months                                  | Number 0 to 100                                                                |
| Item 27 - Duration of HIV (years)                                                                       | Number 0 to 100                                                                |
